# 1           **TACI: an ImageJ plugin for 3D calcium imaging analysis**

2

3   Alisa A. Omelchenko<sup>1</sup>, Hua Bai<sup>1</sup>, Sibtain Hussain<sup>1</sup>, Jordan J. Tyrrell<sup>1,2</sup>, Lina Ni<sup>1\*</sup>

4   <sup>1</sup> School of Neuroscience, Virginia Tech, Blacksburg, Virginia, United States of America, 24061

5   <sup>2</sup> Current address: Eastern Virginia Medical School, Norfolk, Virginia, United States of America,  
6   23507

7

8   \* Corresponding author

9   E-mail: [linani@vt.edu](mailto:linani@vt.edu) (LN)

10   **Keyword:** TACI; calcium imaging analysis; 3D calcium imaging data; z-drift; ImageJ; TrackMate

## 11 **Abstract:**

12 Research in the field of neuroscience has evolved to use complex imaging and computational  
13 tools to extract comprehensive information from data sets. Calcium imaging is a widely used  
14 technique that requires sophisticated software to obtain reproducible results, but many  
15 laboratories struggle to adopt computational methods when updating protocols to meet modern  
16 standards. Difficulties arise due to the lack of computational knowledge and paywalls for  
17 software. In addition, most calcium imaging analysis approaches ignore motion on the z-axis.  
18 Here, we described a workflow to use ImageJ to analyze 3D calcium imaging. We applied  
19 TrackMate, an open-source ImageJ plugin, to track neurons in the lateral (x/y) direction, detect  
20 regions of interest (ROIs), and extract fluorescence intensities. To track motion on the z-axis, we  
21 developed a new ImageJ plugin, TrackMate Analysis of Calcium Imaging (TACI). For neurons  
22 appearing on multiple z-positions, maximum fluorescence values were identified to represent  
23 neurons' intensities of corresponding z-stacks. This workflow does not require coding ability,  
24 avoids human bias, and increases reproducibility. We validated this workflow using fly larval  
25 thermosensitive neurons that displayed movements in all directions during temperature  
26 fluctuation and a 3D calcium imaging dataset acquired from the fly brain.

## 27 **Introduction:**

28 The level of intracellular calcium is a precise marker for neuronal excitability. Calcium imaging  
29 measures the changes in intracellular calcium to understand neuronal activities [1]. Studies in  
30 neuroscience have increasingly used this method due to the development of techniques for  
31 measuring intracellular calcium concentration, including genetically encoded calcium indicators  
32 (GECI), such as GCaMP [2, 3], which can be noninvasively expressed in specific sets of neurons  
33 through genetic approaches. The lower costs of lasers and microscope components have also  
34 increased the use of calcium imaging [4]. Importantly, calcium imaging allows for recording and  
35 studying single neurons as well as large neuron populations simultaneously in freely moving  
36 animals [5].

37 Nevertheless, the analysis of calcium imaging data is challenging because (1) it involves  
38 tracking changes in fluorescence of individual cells over time, (2) the fluorescence signal  
39 intermittently disappears or reappears with neuronal responses, and (3) neurons may shift in all  
40 directions, specifically in and out of a focal plane or appearing on multiple planes [4, 6]. Many  
41 laboratories manually perform calcium imaging analysis, which is time-consuming and becomes  
42 impractical as the length of recordings and the number of neurons increases. Manual analysis  
43 also introduces operator bias, is prone to error, and affects the replicability of experiments.

44 Various software has been developed to accelerate the process of analyzing calcium  
45 imaging and increase its reproducibility. Previously, software was designed in a limited  
46 experimental context making it difficult for other laboratories to adopt. Recent efforts to meet  
47 modern standards for software sharing have led to the development of several tools that can  
48 consistently analyze calcium imaging data across different groups [7-19]. However, many of these  
49 tools still require programming knowledge and/or depend on commercial software. Lack of  
50 programming knowledge and software paywalls deter researchers from adopting these methods.  
51 Moreover, most of these tools focus on correcting x/y motion and ignore motion on the z-axis  
52 [6]. Thus, there is a need for an alternative method to reproducibly analyze 3D calcium imaging  
53 that focuses on neurons appearing on multiple z-planes and exhibiting z-drift. Ideally, this tool  
54 will use open-source software that does not require programming ability so that most  
55 laboratories can readily adopt it.

56 TrackMate is an open-source ImageJ plugin for tracking single particles [20]. It has been  
57 widely used to track particles in various biological studies involving live-cell imaging, including  
58 calcium imaging [11, 20-22]. Generally speaking, calcium imaging analysis includes three steps:  
59 motion correction, region of interest (ROI) detection, and signal extraction [4, 12]. All three steps  
60 can be automated in TrackMate, thus significantly reducing operator bias and increasing  
61 reproducibility in calcium imaging analysis. Importantly, it is an ImageJ plugin and does not  
62 require coding ability.

63 Here, we developed a new ImageJ plugin, TrackMate Analysis of Calcium Imaging (TACI),  
64 to analyze 3D calcium imaging data. First, TACI organizes 3D calcium imaging data by z-positions.  
65 Then, TrackMate is applied to track x/y motion, define ROIs, and extract fluorescence intensities  
66 on each z-plane. TACI is designed to correct motion on the z-axis. Currently, z-drift is corrected  
67 by (1) using maximal or mean projection intensities [23, 24], (2) extracting fluorescence  
68 intensities from 3D ROIs [8, 11, 25], and (3) adopting maximum values across z-stacks [26]. TACI  
69 identifies the maximum value of a z-stack and uses it to represent a cell's intensity at the  
70 corresponding time point. This workflow is suited to analyze 3D calcium imaging with motion in  
71 all directions and/or with neurons (fully) overlapping in the lateral (x/y) direction but appearing  
72 on multiple z-planes. 3D calcium imaging datasets from fly larval thermosensitive neurons and  
73 mushroom neurons in the brain were used to validate this workflow. Of note, both TACI and  
74 TrackMate are open-source ImageJ plugins and do not require any computing knowledge.

75

## 76 **Results:**

### 77 **A workflow of 3D calcium imaging analysis**

78 In this study, we developed a new ImageJ plugin, TrackMate Analysis of Calcium Imaging (TACI),  
79 and described a workflow to use TACI to track z-drift and analyze 3D calcium imaging that  
80 pinpointed responses of individual cells appearing in multiple z-positions (Movie S1). This analysis  
81 process included three steps (Fig 1). First, TACI ORGANIZE function organized 3D calcium  
82 imaging .tif data by z-positions. Images from the same z-position were saved in one folder. TACI  
83 ORGANIZE function could grayscale these images when needed. If image names were not

84 compatible with TACI ORGANIZE function, TACI RENAME function could convert image names to  
85 the required structure.

86 Second, ROIs were detected and tracked, and their fluorescence intensities were  
87 extracted on every z-plane. We used an ImageJ plugin, TrackMate, to accomplish this step.  
88 TrackMate combined the functions of ROIs' detection and tracking and extraction of their  
89 intensities [20, 22]. Images from the same z-position were opened in order by ImageJ as one  
90 stack. Multiple TrackMate parameters were recommended to be adjusted to get optimal results,  
91 including (1) using DoG or LoG detector (Fig S1A), (2) changing the blob diameter, threshold, and  
92 median filters (Fig S1B), (3) setting filters to remove some, if not all, irrelevant signals (Fig S1C),  
93 (4) changing linking max distance, gap-closing max distance, and gap-closing max frame gap (Fig  
94 S1D), and (5) exporting all spots statistics (Fig S1E). When using the same parameter settings,  
95 fluorescence intensities extracted by TrackMate were consistent from one computer or operator  
96 to another and therefore reproducibility was increased (Table S1).

97 Last, for every cell of interest, TACI EXTRACT function sorted mean intensities by the  
98 corresponding time points, identified maximum values of each z-stack, subtracted the  
99 background, and calculated  $\Delta F/F_0$ . TACI MERGE function calculated the average of  $\Delta F/F_0$  of  
100 multiple cells.

## 101 **The maximum value is a good representative of a cell's intensity**

102 We used simulated cells to justify that the maximum value is a good representative of a cell's  
103 intensity. Three cells (3D spheres) of different brightness were created, and z-stacks were  
104 simulated (Fig 2A). These z-stacks had the same z-distance and z-position. A sphere's volume and  
105 filled intensity were multiplied to create its ground truth intensity. TrackMate extracted cell  
106 intensities to determine the maximum intensity value of every cell. The ratio of the maximum  
107 value and the ground truth intensity was then calculated. We discovered that the ratio was the  
108 same for cells of various brightness. Additionally, z-stacks were built using spheres with various  
109 z-distances (Fig 2B) or z-positions (Fig 2C). The ratio of the maximum value and the ground truth  
110 intensity was kept the same. These data suggest that the maximum value is a good representative  
111 of a cell's intensity.

112 An alternative way to represent a cell's intensity is to get the total of intensities from all  
113 z-positions (Fig S2). We calculated the ratio of the sum value and the ground truth intensity. We  
114 found that the ratio increased with decreasing z-distances (Fig S2B), although it remained  
115 constant if spheres had varied brightness (Fig S2A) or z-stacks were at different z-positions (Fig  
116 S2C). Of note, simulated data were obtained under ideal conditions. According to our experience,  
117 stronger signals were easier to detect and extract. Weak signals tended to be ignored, and thus  
118 it was more challenging to precisely extract their intensities. Since weak signals only affect the  
119 sum value, but not the maximum value, the maximum value indicates a cell's intensity more  
120 properly.

## 121 **Fly larval cool neurons respond to temperature changes**

122 We validated this method using the calcium changes to temperature fluctuations in fly larval cool  
123 neurons. A genetically encoded calcium indicator, GCaMP6m [27], was expressed in larval cool  
124 neurons by *Ir21a-Gal4* [28]. When exposed to approximately 27°C, the neurons had a low  
125 intracellular calcium levels (Fig 3A and 4A). When the temperature was decreased to  
126 approximately 10°C and held, the intracellular calcium levels rapidly increased and sustained (Fig  
127 3B and 4A). The calcium levels rapidly dropped when the temperature was increased (Fig 4A).

128 EZcalcium was also applied to analyze calcium changes to temperature fluctuations in fly  
129 larval cool neurons [12]. Although designed to correct both rigid and non-rigid motion, EZcalcium  
130 motion correction function did not always work (Fig S3A,B). Moreover, EZcalcium might extract  
131 inaccurate fluorescence intensities (Fig S3C-F).

## 132 **Maximal projection does not precisely depict the responses**

133 In the previous study [29], maximal projection images were used to extract the fluorescence  
134 intensities (see S4\_Figure in [29]). Although the trend of  $\Delta F/F_0$  over time was similar, the plateau  
135 from maximal projection images was higher. To understand the cause of this difference, we  
136 compared the background intensities. Background intensities from individual z-positions were  
137 significantly lower than those from maximal projection images (Fig 4B). The cell intensities of  $F_0$   
138 and  $F_{\max}$  were also compared, and differences were random in strength and direction (Fig 4C, D).  
139 These data suggest that the extraction of fluorescence signals from maximal projection images  
140 overestimates the background intensities and may randomly affect cell signals.

## 141 **TACI separates overlapping cells**

142 In addition, maximal projection images lose information for overlapping neurons. Fig 5A was a  
143 maximal projection image of three neurons. The white arrowhead pointed to two neurons that  
144 overlapped in the x/y plane but were separate in the ortho view (blue and orange arrowheads in  
145 Fig 5B), indicating these neurons appeared in different z-positions: the orange cell had the  
146 strongest signal on z7 (Fig 5C), while the blue cell had the strongest signal on z10 (Fig 5D). TACI  
147 distinguished these two cells and revealed the delayed but strong activation of the orange cell  
148 (Fig 5F). This information was overlooked when maximal projection images were used (Fig 5E).

149 Since the blue and orange neurons were separated in z-axis, it was possible to generate  
150 maximal projection images for each of them (Fig S4). However, it was arbitrary to determine the  
151 neuron from which the signals on the intermediate z-positions came (yellow arrowhead in Fig  
152 S4E). Importantly, when two neurons overlapped in the z-axis, it became impossible to precisely  
153 generate maximal projection images for each neuron.

154 To investigate whether TACI could distinguish overlapping neurons in the z-axis, we  
155 created two cells with a radius of 11 pixels. 22 one-pixel steps were required for these two cells  
156 to move from no overlap to complete overlap (Fig 5G). Four z-stacks with varied z-positions were  
157 simulated with a z-distance of four pixels (Fig 5H). If the maximum value of two cells matched the  
158 maximum value of a single cell, the distance was regarded as adequate to identify singular  
159 spheres. Otherwise, the distance was insufficient to distinguish the two cells. Our data suggest  
160 that TACI is capable of separating two cells when the overlap in the z-axis is less than half of a  
161 cell's radius (Fig 5I).

## 162 **Analyzing a 3D calcium imaging fly brain dataset**

163 To test whether this workflow can be used to analyze 3D calcium imaging with a large number of  
164 cells, we used a dataset acquired with a confocal microscope [11]. The imaged transgenic flies  
165 (*VT50339-Gal4;UAS-GCaMP6f*) expressed the genetically encoded calcium indicator GCaMP6f in  
166 the mushroom body in the brain [11]. Data from 45 z-positions (spaced at 1.5  $\mu\text{m}$  intervals) was  
167 collected at 50 Hz for 225s (250 time points, please refer to [11] for details about preparation,  
168 equipment and experiment). We analyzed the first half of the dataset (125 time points).

169           When the recording began, seven neurons had obvious fluorescence, and four of them  
170 were analyzed (Fig 6A). The intensities in these neurons decreased over time (Fig 6B). When  
171 octanol was applied (Fig 6C), multiple neurons brightened. We analyzed ten neurons and found  
172 their fluorescence increased simultaneously at time point 92 (Fig 6D), suggesting that these  
173 mushroom neurons respond to octanol odor. Although octanol was applied for 5 seconds, high  
174 fluorescence in these neurons was observed in only one time point (0.9 seconds) and then quickly  
175 dropped, suggesting the response is phasic and transient. We also observed that the maximal z-  
176 drift in this dataset was 4.5  $\mu\text{m}$  and the mean was  $1.92 \pm 0.46 \mu\text{m}$ .

177

## 178 **Discussion:**

179 This study developed a new ImageJ plugin TACI and described a workflow analyzing 3D calcium  
180 imaging and generating reproducible information of the calcium responses. Many currently  
181 available tools focus on calcium imaging data that have a large number of neurons but ignore  
182 motion on the z-axis and do not consider if individual neurons appear on multiple z-planes [6].  
183 During image acquisition in a live organism, movement on the z-axis is unavoidable even when it  
184 is immobilized. Some stimuli, such as temperature change, often cause significant z-drift. For  
185 example, in our experiment, although animals were immobilized by cover slips, larval cool  
186 neurons still displayed a maximal z-drift of 8.25  $\mu\text{m}$  and a mean of  $5.25 \pm 0.71 \mu\text{m}$ . Increasing the  
187 height of z-stacks will record cells of interest during the whole imaging process; but it is not trivial  
188 to analyze motion on the z-axis, especially when individual cells appear on multiple z-positions.  
189 If such movement is ignored, researchers will not obtain the precise calcium responses of these  
190 cells. TACI corrects z-drift by extracting fluorescence signals from every z-position and using the  
191 maximum value to represent a cell's intensity at each time point. It also allows for the separation  
192 of cells that partially overlap on the z-axis, and/or overlap in the lateral (x/y) direction but appear  
193 on different z-positions.

194           In this workflow, we used TrackMate to track cells, identify ROIs, and extract the  
195 fluorescence intensities of cells. Many studies, including a recent study from our lab [29],  
196 manually accomplished this step. This manual process is time-consuming and prone to human  
197 bias; TrackMate achieves automation of motion correction, ROI identification, and data



198 extraction. For motion correction, we rely on TrackMate to track movements in the lateral (x/y)  
199 direction. TrackMate is designed for Brownian (random-walk) motion and receives a good  
200 evaluation for spot tracking performance [30]. This tracking-based method may be more suitable  
201 for large sudden movements than frame-based motion correction (Fig S3A,B). When using  
202 TrackMate to identify an ROI, each detected ROI is assigned a quality value – the local maximal  
203 value [20]. If this value is lower than what the detector is configured with, the ROI is discarded  
204 [20]. If an ROI cannot be detected, a decrease in the threshold makes detectors more sensitive.  
205 TrackMate creates interactive windows to allow the manual validation of every ROI. When using  
206 the same parameter settings, fluorescence intensities extracted by TrackMate are consistent  
207 from one computer or operator to another (Table S1). Another challenge for calcium analysis is  
208 that cells intermittently disappear and reappear with stimulation. TrackMate can track the cells  
209 when they reappear and register them as the same TRACK\_IDs. Last but not least, TrackMate can  
210 track individual ROIs and extract their intensities from large-scale calcium imaging datasets  
211 obtained by two-photon microscopy and microendoscopy (Fig S5 and S6) [10, 31]. This workflow  
212 is therefore appropriate for analyzing calcium imaging data from different types of microscopes.

213 Although this workflow is semi-automatic and still requires manual efforts from  
214 researchers, it provides a computational and reproducible approach for 3D calcium imaging  
215 analysis. Importantly, this workflow is based on ImageJ and does not require programming  
216 software or knowledge. Limitations and their potential solutions for this workflow are listed  
217 below.

218 1. This method is not suited to analyzing a large number of neurons simultaneously.  
219 TrackMate may track over 100,000 cells. However, during image acquisition in a live organism,  
220 both non-rigid and rigid motions occur, and such movement dampens the application of  
221 TrackMate for calcium imaging in dense cells. Moreover, this workflow lacks cell registration  
222 across z-positions. Researchers must check TrackMate outcomes manually to get accurate results,  
223 and thus it becomes impractical to analyze dozens of cells. Other calcium imaging analyses can  
224 be used to replace TrackMate to correct motion and extract ROIs' intensities. For example, we  
225 applied EZcalcium to analyze the calcium changes to temperature fluctuations in fly larval cool  
226 neurons (Fig S3).

227           2. Two steps in this workflow introduce unavoidable variations: (1) The background  
228 intensities may cause variation. Operators are unlikely to pick the same regions to extract  
229 background intensities. Thus, we recommend extracting background intensities from nearby  
230 same-size blobs that do not contain fluorescence signals to minimize the variation. Another  
231 recommendation is to use the average of three to five background intensities from different time  
232 points as the background intensity for the corresponding z-position. (2) Weak signals may also  
233 introduce variation. When the signals are weak, TrackMate may mistake noise as the signals of  
234 the cells. In this case, researchers must manually check and decide whether these signals are  
235 correct.

236           3. TACI only accepts .tif files and a specific file name structure  
237 (`{file_name}_{phase}{t}{z}{channel}`). Other file formats compatible with ImageJ can be easily  
238 converted to .tif files by ImageJ. TACI has a RENAME function that converts image names to the  
239 required structure so that TACI is compatible with calcium imaging data obtained from different  
240 systems. Calcium imaging data could be analyzed by TrackMate directly if file formats are  
241 compatible with TrackMate and the data are organized by z-positions.

242           4. TACI is designed for calcium imaging data with constant backgrounds. Subtracting the  
243 corresponding background information from ROI intensities at each time point is one way to  
244 correct fluctuating backgrounds. TACI provides ROI intensities at each time point in the  
245 `python_files` folder. The background intensities could be represented by (1) the images' mean  
246 intensities or (2) the mean intensities of ROIs with no active cells. ImageJ provides methods to  
247 obtain the images' mean intensities (Image>Stack>Measure Stack) (Fig S6A) and mean intensities  
248 of random ROIs (Analyze>Tools>ROI Manager>Multi Measure) (Fig S6B,C). Subtraction of mean  
249 intensities of entire images or a single spot with no active cells resulted in similar calcium changes  
250 over time (Fig S6D-O). If photobleaching happens during calcium imaging, the Bleach Correction  
251 function (Image > Adjust > Bleach Correction) may be run prior to TrackMate.

252           5. TACI uses the first value of each z-position as  $F_0$  to calculate  $\Delta F/F_0$ . If this  $F_0$  is not  
253 appropriate [32], TACI provides files including raw data for each neuron in the `python_files` folder.

254

## 255 **Materials and methods:**

### 256 **Fly strains**

257 *Ir21a-Gal4* [28], *Ir93a-Gal4* [33], *Ir68a-Gal4* [34], and *UAS-GCaMP6m* (*P{20XUAS-IVS-*  
258 *GCaMP6m}attp2*) [27] were previously described. *Ir21a-Gal80* was created by subcloning the  
259 *Ir21a* promoter region into *pBPGAL80Uw-6* (Addgene plasmid # 26236) [28, 35].

### 260 **Calcium imaging**

261 Calcium imaging data in Fig 3, Fig 4, and Fig S3 were from the S4\_Figure in a previous study [29]  
262 and were reanalyzed using the current workflow. The S4\_Figure in the previous study [29] was  
263 analyzed using maximal projection images. Briefly, in *Ir21a-Gal4* fly larvae, dorsal organ cool  
264 neurons expressed the calcium indicator, GCaMP6 [27, 28]. Three-day-old larvae were  
265 immobilized between a glass slide and a glass coverslip with 1 x phosphate buffered saline (PBS).  
266 The temperature was held at approximately 27°C for 30 seconds and then was decreased to  
267 approximately 10°C for 30 seconds. Then, the temperature was held at 10°C for approximately  
268 60 seconds and returned to 27°C for 30 seconds. A different temperature stimulus was applied  
269 to generate calcium imaging data in Fig 5, Fig S4, and Fig S7. In this experiment, the temperature  
270 was held at approximately 27°C for 30 seconds, decreased to approximately 15°C for 30 seconds,  
271 and then returned to approximately 24°C for 30 seconds.

### 272 **Analyzing calcium imaging**

273 Calcium imaging files were exported to .tif files using data acquisition software or converted to .tif  
274 files by ImageJ if file formats were compatible with ImageJ. These files were then organized  
275 according to z-positions using RENAME and ORGANISE functions in TACI.

276 ImageJ opened all images in a folder of a single z-position and presented them as one  
277 stack in order. TrackMate was then applied to extract the fluorescence intensities of cells of  
278 interest. We recommended adjusting the following parameters in TrackMate. (1) Use DoG or LoG  
279 detectors (Fig S1A). DoG director is more sensitive than LoG when the same threshold was  
280 applied (Fig S7). (2) Change the blob diameter, threshold, and median filter (Fig S1B). Adjust the  
281 blob diameter based on the sizes of the cells. The blob diameter should be similar to the diameter  
282 of the cells. If cells were oval, the blob diameter should be similar to the minor axis. An increase

283 in the threshold and use of the median filter helped to avoid background noise being picked up  
284 as signals. (3) Set the filters to remove some, if not all, irrelevant signals (Fig S1C). Filters X and Y  
285 were used to remove the irrelevant signals that were distant from the real signals. When filters  
286 were set on one image, it was crucial to check all other images to ensure that the real signals  
287 were not removed. We recommended analyzing them one by one. In Fig S1C, to analyze the left  
288 cell, the right cell (arrowhead) and irrelevant signal (arrow) (Fig S1C1) could be removed by  
289 setting filters X and Y (Fig S1C2). (4) Set linking max distance, gap-closing max distance, and gap-  
290 closing max frame gap (Fig S1D). We recommended setting the linking max distance and gap-  
291 closing max distance to be three to five times the blob diameter, especially when samples moved  
292 significantly over time. This setting helped decrease the number of tracks. We recommended  
293 setting gap-closing max frame gap to the number of images in the stack. (5) Export ROIs' mean  
294 intensities (Fig S1E). If an old TrackMate version was used, choose Export all spots statistics in  
295 Select an action window (Fig S1E). If the TrackMate version was 7.6.1 or higher, choose Spots in  
296 Display options window. Both files were interactive with the image window: highlighting an ROI  
297 displayed the corresponding ROI in the image window. The same TRACK\_ID was supposed to  
298 represent the same ROI at different time points. However, this was not always true and needed  
299 to be corrected manually, when necessary. These files included mean intensities  
300 (MEAN\_INTENSITY or MEAN\_INTENSITY\_CH1) of the cell of interest at corresponding time points  
301 (POSITION\_T). If TrackMate did not recognize the ROI at some time points, the time points would  
302 not be displayed.

303 Next, TACI EXTRACT function created a list including every time point and sorted the mean  
304 intensities into the corresponding time points, identified the maximum value of each z-stack,  
305 subtracted the background, and calculated  $\Delta F/F_0$ . TACI was designed for calcium imaging data  
306 with constant backgrounds. For calcium imaging data with fluctuating backgrounds, please refer  
307 to the Discussion section. In this study, the background intensity for each z-position was  
308 estimated by using the average value of three to five nearby same-size blobs that did not contain  
309 fluorescence signals and were from different time points.  $\Delta F/F_0$  was calculated by the following  
310 formula. The first value of each z-position was used as  $F_0$ .

311

$$\frac{\Delta F}{F_0} = \frac{F - F_0}{F_0}$$

## 312 **Simulation**

313 3D spheres with different brightness were created by a python script, and the ground truth  
314 intensities of each sphere were calculated by the following formula.

$$315 \text{Ground\_truth Intensity} = V * i$$

316 V: a sphere's volume; i: the filled intensity

317 z-stacks with varied distances or positions were simulated, and TrackMate was applied to  
318 analyze these z-stacks. Ratios of maximum values or sum values and the ground truth intensities  
319 were calculated to justify that the maximum value is a good representative of a cell's intensity.

320 For Fig 5, two 3D spheres of radius 11 were simulated in 3D space to depict 0 pixels  
321 overlapping to fully overlapping neurons by moving one sphere one pixel at a time. Four z-stacks  
322 with a z-distance of four pixels at different z-positions were created and analyzed by TrackMate.  
323 When the maximum value of the two spheres' z-stack matched the maximum value of a single  
324 sphere's z-stack, the distance was adequate to identify singular spheres. If the maximum value  
325 from the two spheres' z-stack was higher than that from a single sphere's z-stack, the distance  
326 was insufficient to distinguish these two spheres.

## 327 **Statistical analysis**

328 Statistical details of experiments were mentioned in the Fig 3 legend. The normality of  
329 distributions was assessed by the Shapiro-Wilk W test ( $p \leq 0.05$  rejected normal distribution). For  
330 data that did not conform to a normal distribution, statistical comparisons were performed by  
331 the Wilcoxon test. Data analysis was performed using GraphPad Prism 9.

332

## 333 **Data and code availability**

334 ImageJ plugin is available at: [https://github.com/niflylab/TACI\\_CalciumImagingPlugin](https://github.com/niflylab/TACI_CalciumImagingPlugin).

335 Original statistics and raw data are available at: <https://doi.org/10.7910/DVN/AXEVQT>.

336

## 337 **Acknowledgements:**

338           A Zeiss LSM 880 in the Fralin Imaging Center was used to collect calcium imaging data.  
339   We acknowledge Dr. Lenwood S.Heath for constructive comments on the manuscript and Steven  
340   Giavasis for comments on the GitHub README file. This work was supported by NIH  
341   R21MH122987 (<https://www.nimh.nih.gov/index.shtml>) and NIH R01GM140130  
342   (<https://www.nigms.nih.gov/>) to L.N. The funders had no role in the study design, data collection  
343   and analysis, decision to publish, or preparation of the manuscript.

## 344 **References:**

- 345 1. Grienberger C, Konnerth A. Imaging calcium in neurons. *Neuron*. 2012;73(5):862-85.
- 346 2. Nakai J, Ohkura M, Imoto K. A high signal-to-noise Ca(2+) probe composed of a single  
347 green fluorescent protein. *Nat Biotechnol*. 2001;19(2):137-41.
- 348 3. Zhang Y, Rózsa M, Bushey D, Zheng J, Reep D, Liang Y, et al. jGCaMP8 Fast Genetically  
349 Encoded Calcium Indicators. *Janelia Research Campus*. 2020;Online resource.
- 350 4. Robbins M, Christensen CN, Kaminski CF, Zlatic M. Calcium imaging analysis - how far have  
351 we come? *F1000Research*. 2021;10:258.
- 352 5. Oh J, Lee C, Kaang BK. Imaging and analysis of genetically encoded calcium indicators  
353 linking neural circuits and behaviors. *Korean J Physiol Pharmacol*. 2019;23(4):237-49.
- 354 6. Stringer C, Pachitariu M. Computational processing of neural recordings from calcium  
355 imaging data. *Current opinion in neurobiology*. 2019;55:22-31.
- 356 7. Pnevmatikakis EA, Giovannucci A. NoRMCorre: An online algorithm for piecewise rigid  
357 motion correction of calcium imaging data. *J Neurosci Methods*. 2017;291:83-94.
- 358 8. Nguyen JP, Linder AN, Plummer GS, Shaevitz JW, Leifer AM. Automatically tracking  
359 neurons in a moving and deforming brain. *PLoS Comput Biol*. 2017;13(5):e1005517.
- 360 9. Lagache T, Hanson A, Pérez-Ortega JE, Fairhall A, Yuste R. EMC<sup>2</sup>: A versatile  
361 algorithm for robust tracking of calcium dynamics from individual neurons in behaving animals.  
362 *bioRxiv*. 2021:2020.06.22.165696.
- 363 10. Giovannucci A, Friedrich J, Gunn P, Kalfon J, Brown BL, Koay SA, et al. CalmAn an open  
364 source tool for scalable calcium imaging data analysis. *eLife*. 2019;8.
- 365 11. Delestro F, Scheunemann L, Pedrazzani M, Tchenio P, Preat T, Genovesio A. In vivo large-  
366 scale analysis of *Drosophila* neuronal calcium traces by automated tracking of single somata.  
367 *Scientific reports*. 2020;10(1):7153.
- 368 12. Cantu DA, Wang B, Gongwer MW, He CX, Goel A, Suresh A, et al. EZcalcium: Open-Source  
369 Toolbox for Analysis of Calcium Imaging Data. *Front Neural Circuits*. 2020;14:25.
- 370 13. Eglen SJ, Marwick B, Halchenko YO, Hanke M, Sufi S, Gleeson P, et al. Toward standard  
371 practices for sharing computer code and programs in neuroscience. *Nature neuroscience*.  
372 2017;20(6):770-3.
- 373 14. Pachitariu M, Stringer C, Dipoppa M, Schröder S, Rossi LF, Dalgleish H, et al. Suite2p:  
374 beyond 10,000 neurons with standard two-photon microscopy. *bioRxiv*. 2017:061507.
- 375 15. Corder G, Ahanonu B, Grewe BF, Wang D, Schnitzer MJ, Scherrer G. An amygdalar neural  
376 ensemble that encodes the unpleasantness of pain. *Science (New York, NY)*. 2019;363(6424):276-  
377 81.
- 378 16. Lagache T, Hanson A, Pérez-Ortega JE, Fairhall A, Yuste R. Tracking calcium dynamics from  
379 individual neurons in behaving animals. *PLoS Comput Biol*. 2021;17(10):e1009432.
- 380 17. Kolar K, Dondorp D, Zwiggelaar JC, Høyer J, Chatzigeorgiou M. Mesmerize is a dynamically  
381 adaptable user-friendly analysis platform for 2D and 3D calcium imaging data. *Nature*  
382 *communications*. 2021;12(1):6569.
- 383 18. Moein M, Grzyb K, Gonçalves Martins T, Komoto S, Peri F, Crawford AD, et al. CaSiAn: a  
384 Calcium Signaling Analyzer tool. *Bioinformatics (Oxford, England)*. 2018;34(17):3052-4.

- 385 19. Zhou P, Resendez SL, Rodriguez-Romaguera J, Jimenez JC, Neufeld SQ, Giovannucci A, et  
386 al. Efficient and accurate extraction of in vivo calcium signals from microendoscopic video data.  
387 eLife. 2018;7.
- 388 20. Tinevez JY, Perry N, Schindelin J, Hoopes GM, Reynolds GD, Laplantine E, et al. TrackMate:  
389 An open and extensible platform for single-particle tracking. *Methods (San Diego, Calif)*.  
390 2017;115:80-90.
- 391 21. Schindelin J, Arganda-Carreras I, Frise E, Kaynig V, Longair M, Pietzsch T, et al. Fiji: an  
392 open-source platform for biological-image analysis. *Nat Methods*. 2012;9(7):676-82.
- 393 22. Fazeli E, Roy NH, Follain G, Laine RF, von Chamier L, Hänninen PE, et al. Automated cell  
394 tracking using StarDist and TrackMate. *F1000Research*. 2020;9:1279.
- 395 23. Apthorpe NJ, Riordan AJ, Aguilar RE, Homann J, Gu Y, Tank DW, et al. Automatic neuron  
396 detection in calcium imaging data using convolutional networks. *Proceedings of the 30th  
397 International Conference on Neural Information Processing Systems; Barcelona, Spain: Curran  
398 Associates Inc.; 2016. p. 3278–86.*
- 399 24. Zhang QX, He XJ, Wong HC, Kindt KS. Functional calcium imaging in zebrafish lateral-line  
400 hair cells. *Methods Cell Biol*. 2016;133:229-52.
- 401 25. Klein M, Afonso B, Vonner AJ, Hernandez-Nunez L, Berck M, Tabone CJ, et al. Sensory  
402 determinants of behavioral dynamics in *Drosophila* thermotaxis. *Proceedings of the National  
403 Academy of Sciences of the United States of America*. 2015;112(2):E220-9.
- 404 26. Dombeck DA, Khabbaz AN, Collman F, Adelman TL, Tank DW. Imaging large-scale neural  
405 activity with cellular resolution in awake, mobile mice. *Neuron*. 2007;56(1):43-57.
- 406 27. Chen TW, Wardill TJ, Sun Y, Pulver SR, Renninger SL, Baohan A, et al. Ultrasensitive  
407 fluorescent proteins for imaging neuronal activity. *Nature*. 2013;499(7458):295-300.
- 408 28. Ni L, Klein M, Svec KV, Budelli G, Chang EC, Ferrer AJ, et al. The Ionotropic Receptors IR21a  
409 and IR25a mediate cool sensing in *Drosophila*. eLife. 2016;5.
- 410 29. Tyrrell JJ, Wilbourne JT, Omelchenko AA, Yoon J, Ni L. Ionotropic Receptor-dependent cool  
411 cells control the transition of temperature preference in *Drosophila* larvae. *PLoS genetics*.  
412 2021;17(4):e1009499.
- 413 30. Chenouard N, Smal I, de Chaumont F, Maška M, Sbalzarini IF, Gong Y, et al. Objective  
414 comparison of particle tracking methods. *Nat Methods*. 2014;11(3):281-9.
- 415 31. Formozov A, Chini M, Dieter A, Yang W, Pöpplau JA, Hanganu-Opatz IL, et al. Calcium  
416 Imaging and Electrophysiology of hippocampal Activity under Anesthesia and natural Sleep in  
417 Mice. *Sci Data*. 2022;9(1):113.
- 418 32. Neugornet A, O'Donovan B, Ortinski PI. Comparative Effects of Event Detection Methods  
419 on the Analysis and Interpretation of Ca(2+) Imaging Data. *Front Neurosci*. 2021;15:620869.
- 420 33. Sanchez-Alcaniz JA, Silbering AF, Croset V, Zappia G, Sivasubramaniam AK, Abuin L, et al.  
421 An expression atlas of variant ionotropic glutamate receptors identifies a molecular basis of  
422 carbonation sensing. *Nature communications*. 2018;9(1):4252.
- 423 34. Knecht ZA, Silbering AF, Cruz J, Yang L, Croset V, Benton R, et al. Ionotropic Receptor-  
424 dependent moist and dry cells control hygrosensation in *Drosophila*. eLife. 2017;6.
- 425 35. Pfeiffer BD, Ngo TT, Hibbard KL, Murphy C, Jenett A, Truman JW, et al. Refinement of tools  
426 for targeted gene expression in *Drosophila*. *Genetics*. 2010;186(2):735-55.
- 427



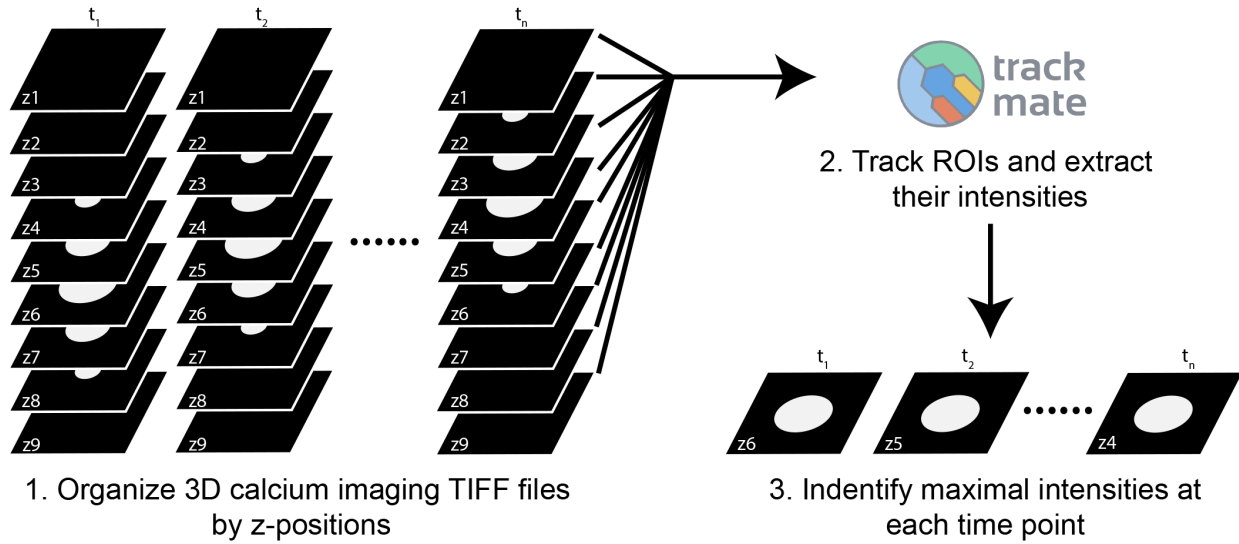

428  
429  
430  
431  
432  
433  
434  
435  
436  
437

**Fig 1. Workflow of using TACI to analyze 3D calcium imaging.** This workflow includes three steps. Step 1. TACI organizes 3D calcium imaging .tif files by z-positions. Images from the same z-position are saved in the same folder. If necessary, TACI can first rename images to the required naming structure and grayscale them. Step 2. Detect and track ROIs and extract their intensities. Images from the same z-positions are analyzed as a stack. This study uses TrackMate to accomplish this step. Step 3. TACI creates a list including every time point and fills the mean intensities into the corresponding time points, identifies the maximum value of each z-stack, subtracts the background, and calculates  $\Delta F/F_0$ . TACI also calculates the average of  $\Delta F/F_0$  of multiple cells if needed.

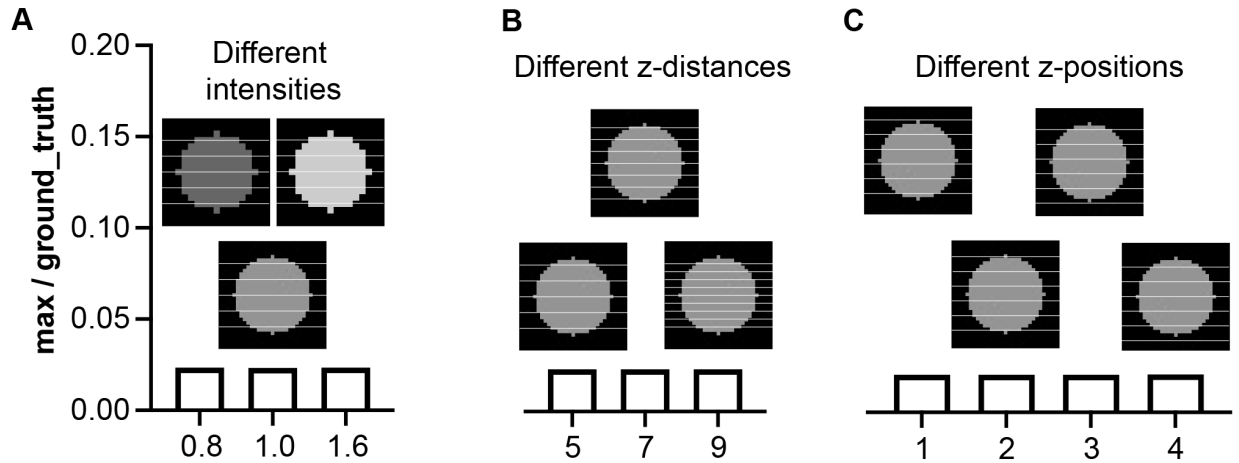

438

439

440

441

442

**Fig 2. The maximum value is a good representative of a cell's intensity.** (A) z-stacks are created from simulated cells with different intensities. (B) z-stacks with different z-distances are simulated. (C) z-stacks with different z-positions are simulated. max: the maximum value of a z-stack. ground\_truth: the product of the simulated cell's volume and its filled intensity.

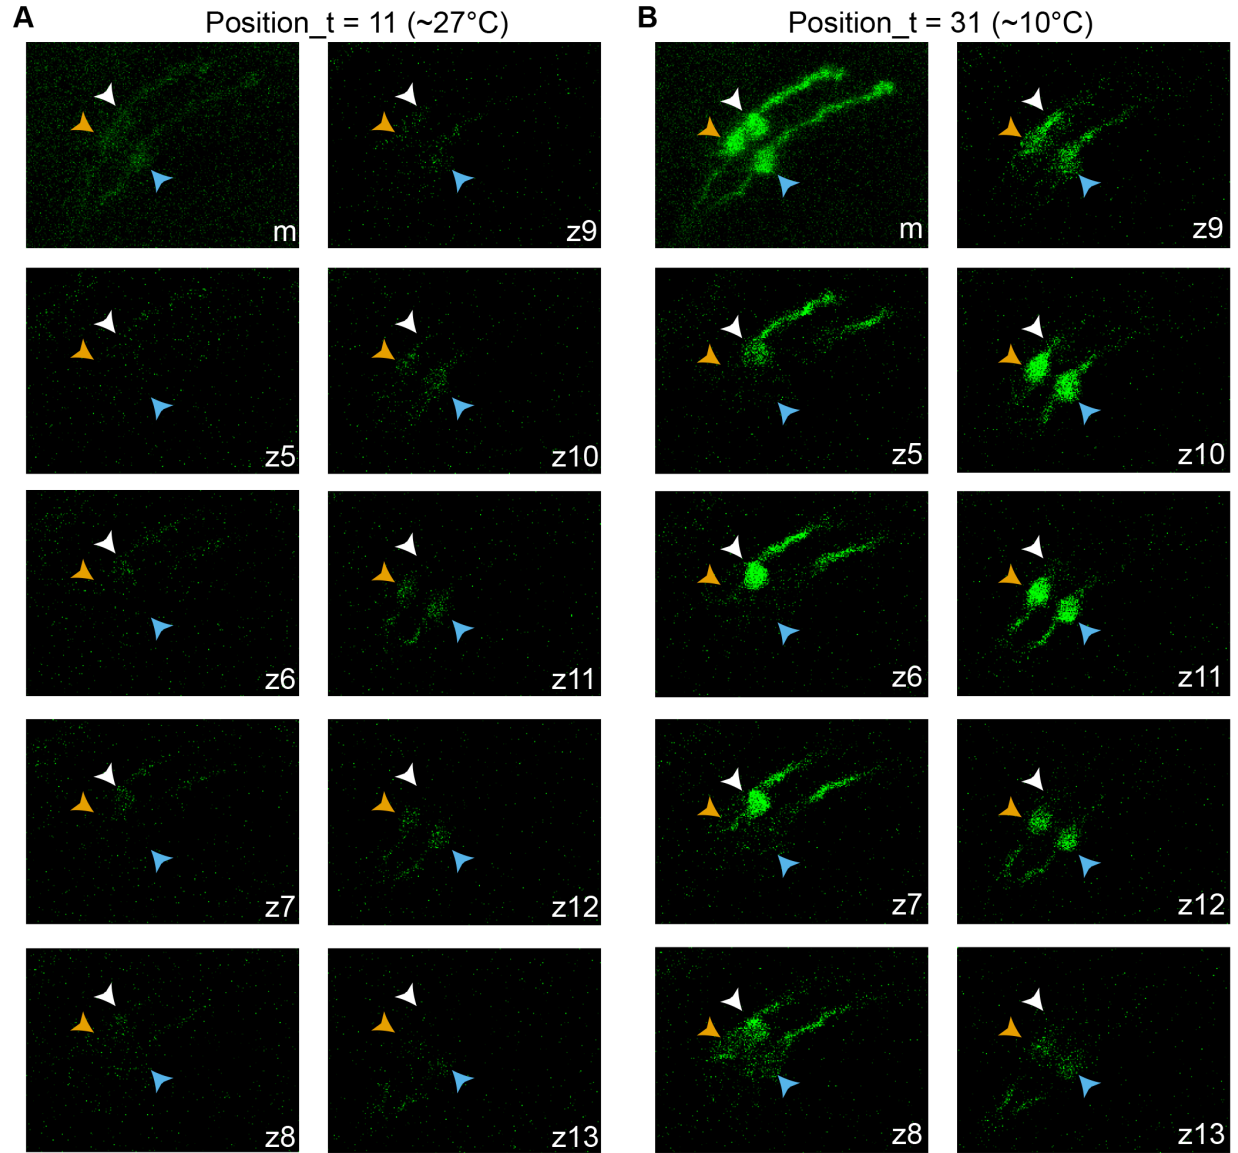

443

444

445 **Fig 3. Calcium imaging of fly larval cool cells in inactive and active states.** (A) Cells are barely

446 visible in the inactive state. (B) Cells are strongly fluorescent in the active state. Different color

447 arrowheads indicate different cells. The genotype is *Ir21a-Gal4;UAS-GCaMP6m*. m: maximal

448 projection. z5-13: images at z-positions from 5 to 13. In (B), the cell dictated by white arrowheads

is shown on z5 to z8; the cells dictated by orange and blue arrowheads are shown on z8 to z13.

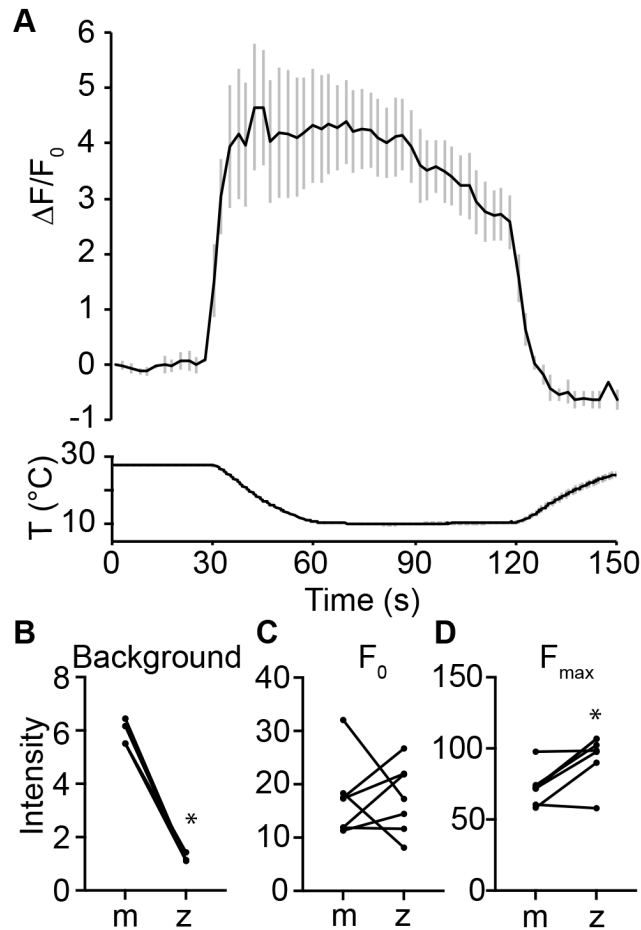

449

450

451

452

453

454

455

**Fig 4. Maximal projection images overestimate background signals.** (A) Fluorescence is quantified as the change in fluorescence intensity compared to the initial intensity. The genotype is *Ir21a-Gal4;UAS-GCaMP6m*.  $n = 7$  cells from 3 animals. Traces, mean  $\pm$  SEM. (B) Background intensities from maximal projection images (m) and from individual z-positions (z). Wilcoxon test, \*  $p < 0.05$ . (C,D) Fluorescence intensities from maximal projection images (m) and from individual z-positions (z) at time points of  $F_0$  and  $F_{\max}$ . Wilcoxon test, \*  $p < 0.05$ .

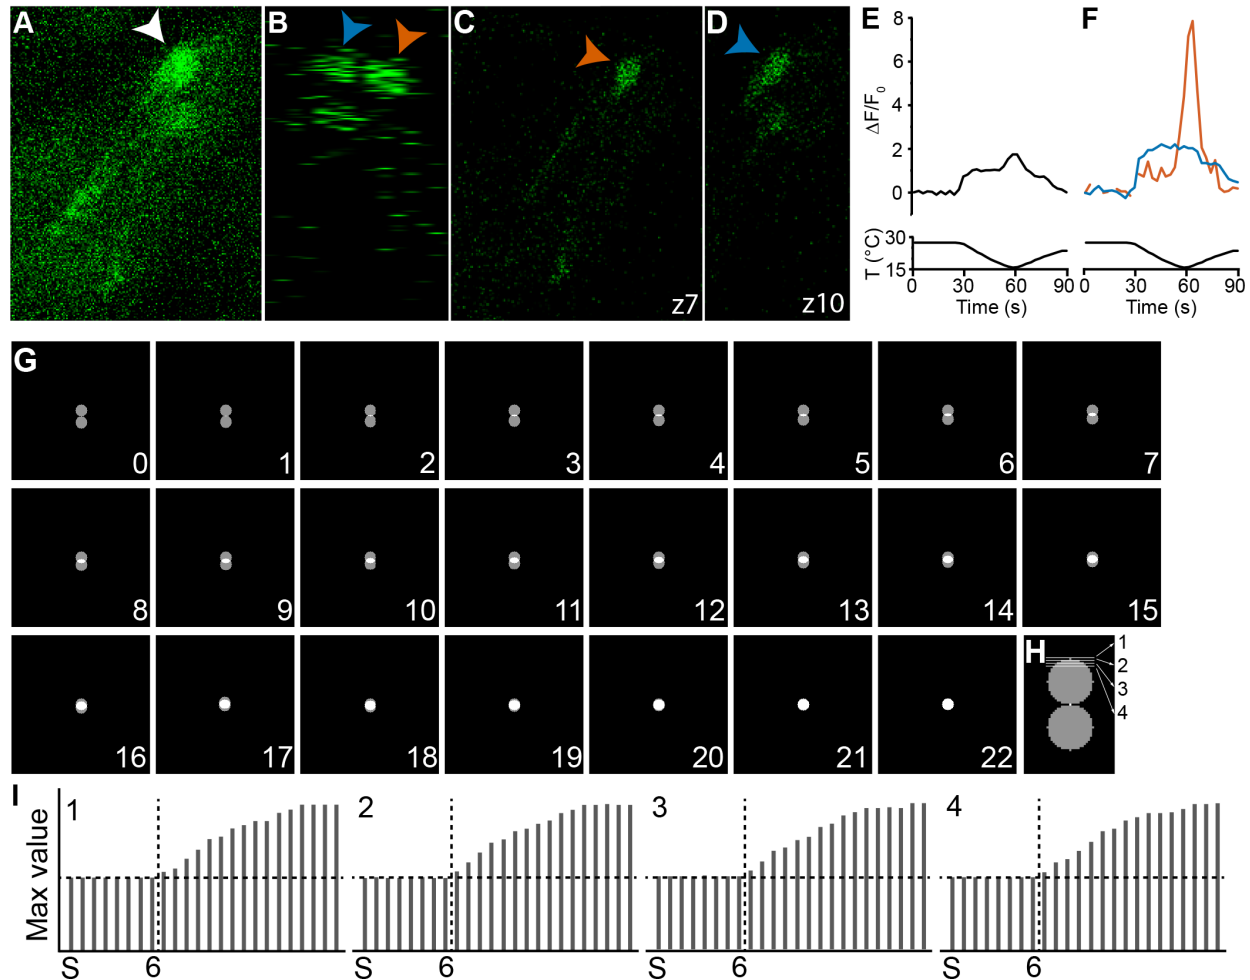

456  
457  
458  
459  
460  
461  
462  
463  
464  
465  
466  
467  
468  
469

**Fig 5. Maximum value performs better in separating overlapping cells.** (A) Two neurons are overlapped (white arrowhead) in a maximal projection. The genotype is *Ir21a-Gal4;UAS-GCaMP6m*. (B) These neurons are separate in the ortho view (blue and orange arrowheads). (C,D) The orange cell appears on z7 (C), while the blue cell appears on z10 (D). (E) Fluorescence change is quantified using maximal projection images. (F) Fluorescence changes of orange and blue cells are quantified using maximum values from individual z-positions. (G) Two simulated overlapping cells in the z-axis. Each cell has a radius of 11 pixels, and each step moves one pixel, so there are 22 steps from no overlap to complete overlap. (H) Four different z-positions with a z-distance of four pixels are simulated. (I) Each z-position is analyzed. S: the maximum intensity value from a single cell. 6: overlap six pixels in (G). Horizontal dash line: the single cell's maximum value. Vertical dash line: maximum values of the two cells are higher than that of a single cell. If the maximum value of two overlapping cells matches that of a single sphere, the distance is sufficient to identify singular spheres. Otherwise, the distance is insufficient to separate two cells.

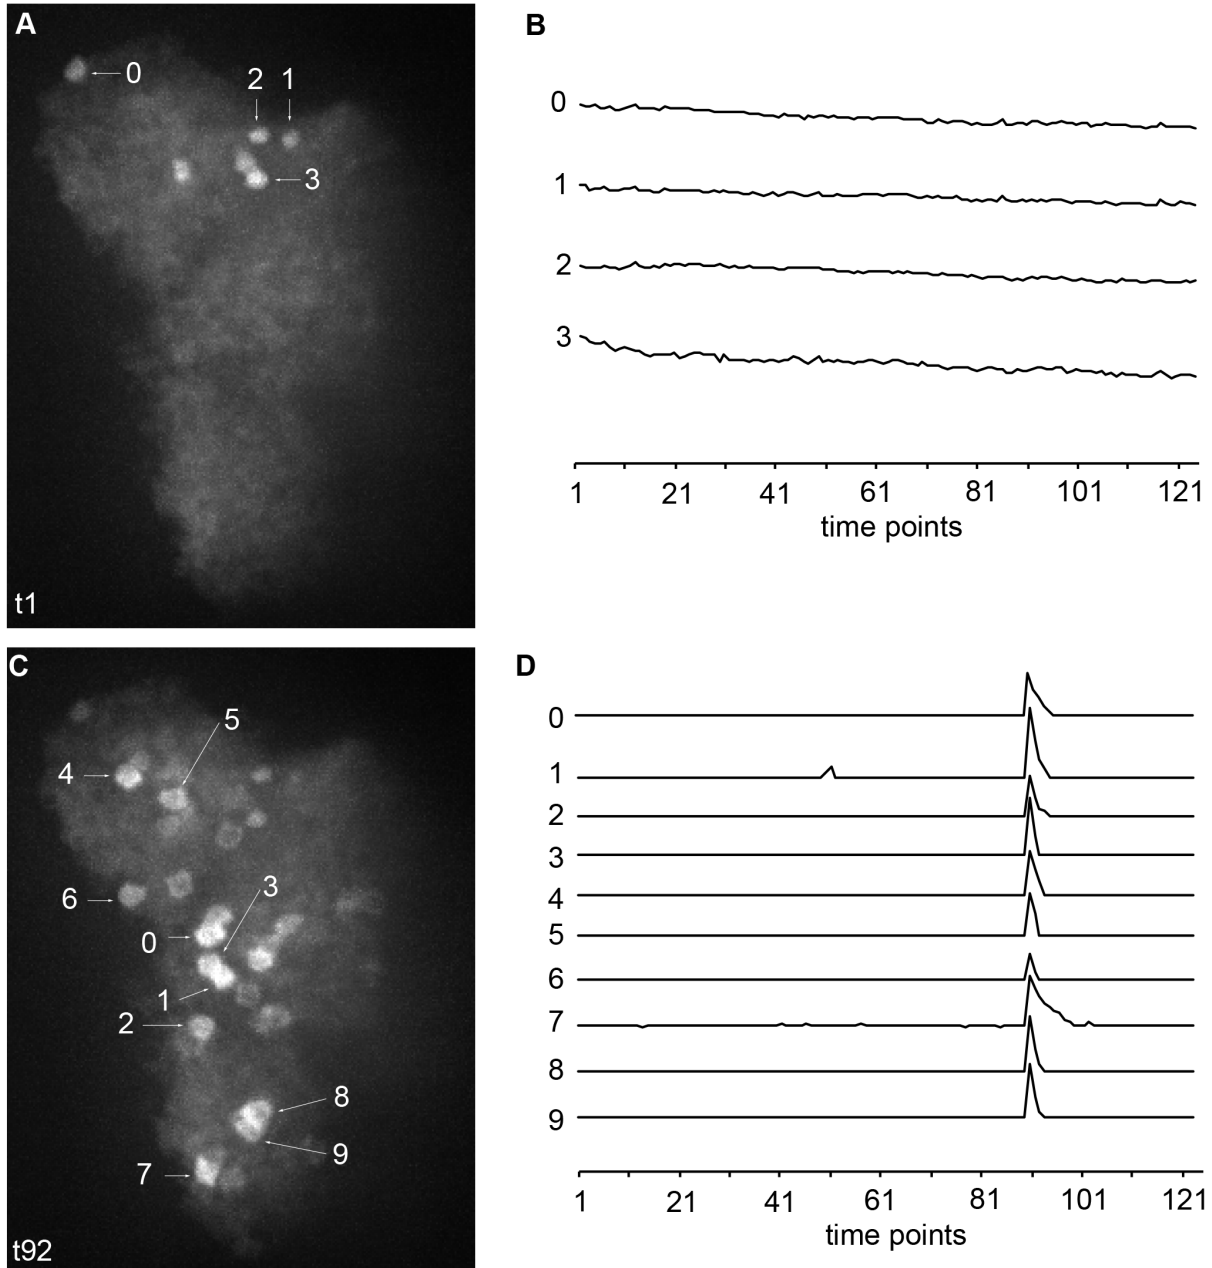

470  
471  
472  
473  
474  
475

**Fig 6. Analyzing a 3D calcium imaging fly brain dataset.** (A) The maximal projection image at time point 1 (t1). 0-3 dictate the analyzed four neurons. (B) Fluorescence changes of neurons 0-3 in (A) during time points 1 to 125. (C) The maximal projection image at time point 92 (t92). 0-9 dictate the analyzed ten neurons. (D) Fluorescence changes of neurons 0-9 in (C) during time points 1 to 125.

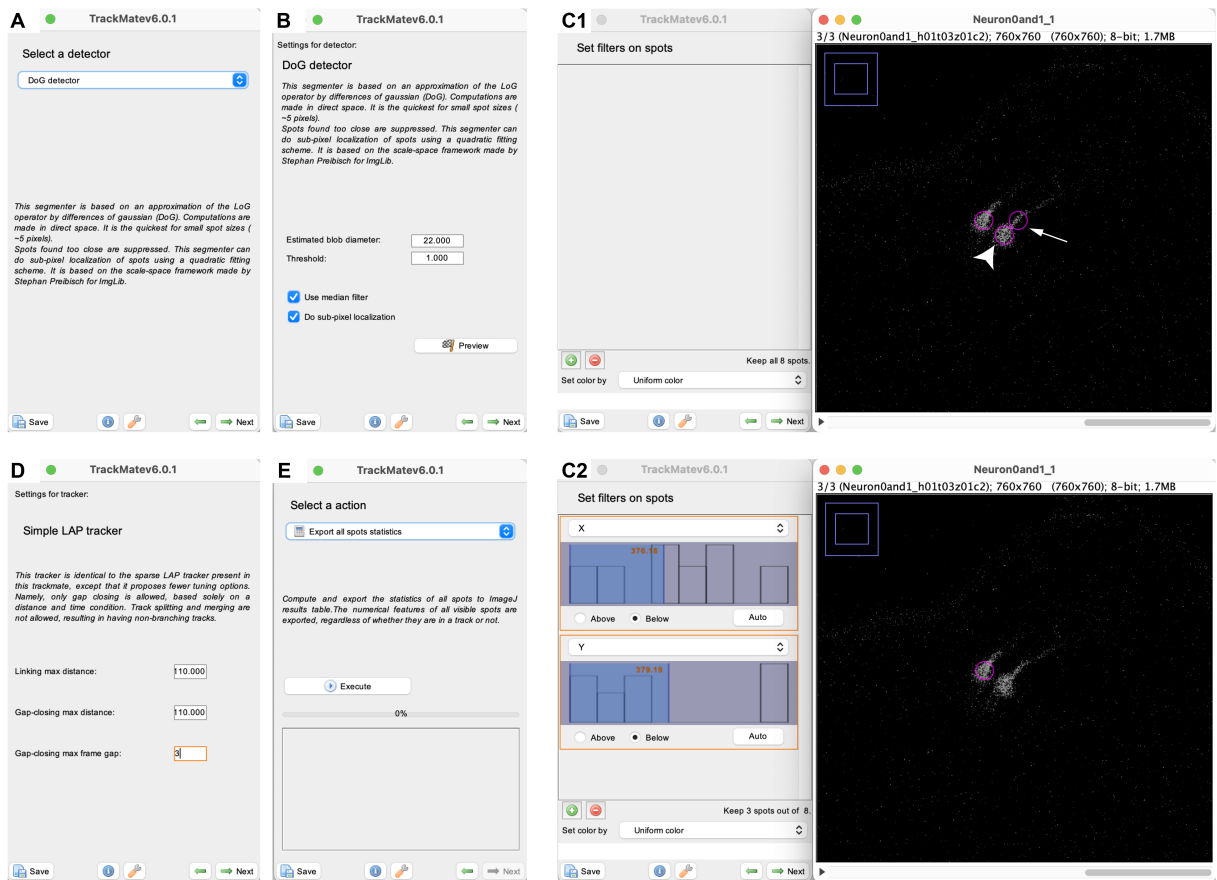

476  
477 **Fig S1. Use TrackMate to extract cells' intensities.** The following parameters are recommended  
478 to be adjusted. (A) Select a detector. (B) Set parameters of the detector. If a DoG detector is used,  
479 we recommend changing the blob diameter based on the sizes of the cells. The blob diameter  
480 should be similar to the diameter of the cells. If cells are oval, the blob diameter should be similar  
481 to the minor axis. Increasing the threshold can help decrease the effects of the background noise.  
482 If signals are strong, we recommend using the median filter, which can help decrease the Salt  
483 and Pepper noise. (C) Place filters on spots. When irrelevant signals are picked up, filters help  
484 remove some, if not all, irrelevant signals. Filters X and Y can easily remove the irrelevant signals  
485 that are distant from the real signals. When filters are placed on one image, it is crucial to check  
486 all other images to make sure the real signals are not removed. In (C1), two cells of interest and  
487 one irrelevant signal (arrow) are picked up (magenta circles). To analyze the left cell, the right cell  
488 (arrowhead) and irrelevant signal (arrow) can be removed by setting filters X and Y (C2). (D)  
489 Simple LAP tracker. We recommend setting linking max distance and gap-closing max distance to  
490 be three to five times the blob diameter, especially when samples move over time. These settings  
491 help decrease the number of tracks. We recommend setting the gap-closing max frame gap to  
492 the number of images in the folder. (E) Select an action. We recommend choosing the option of  
493 Export all spots statistics. If a new version of TrackMate is used, similar information is exported  
494 by choosing Spots in the Display options window.

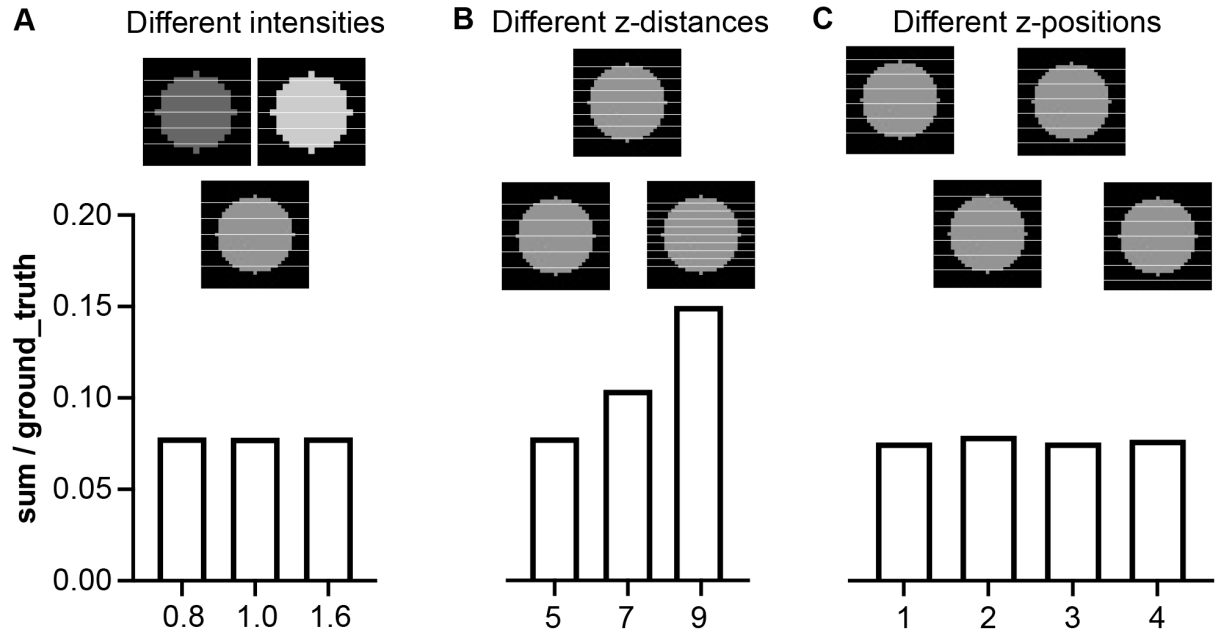

495  
496  
497  
498  
499

**Fig S2. The sum value may not be a good representative of a cell's intensity.** (A) z-stacks are created from simulated cells with different intensities. (B) z-stacks with different z-distances are simulated. (C) z-stacks with different z-positions are simulated. sum: the total intensities of all z-positions. ground\_truth: the product of the simulated cell's volume and its filled intensity.



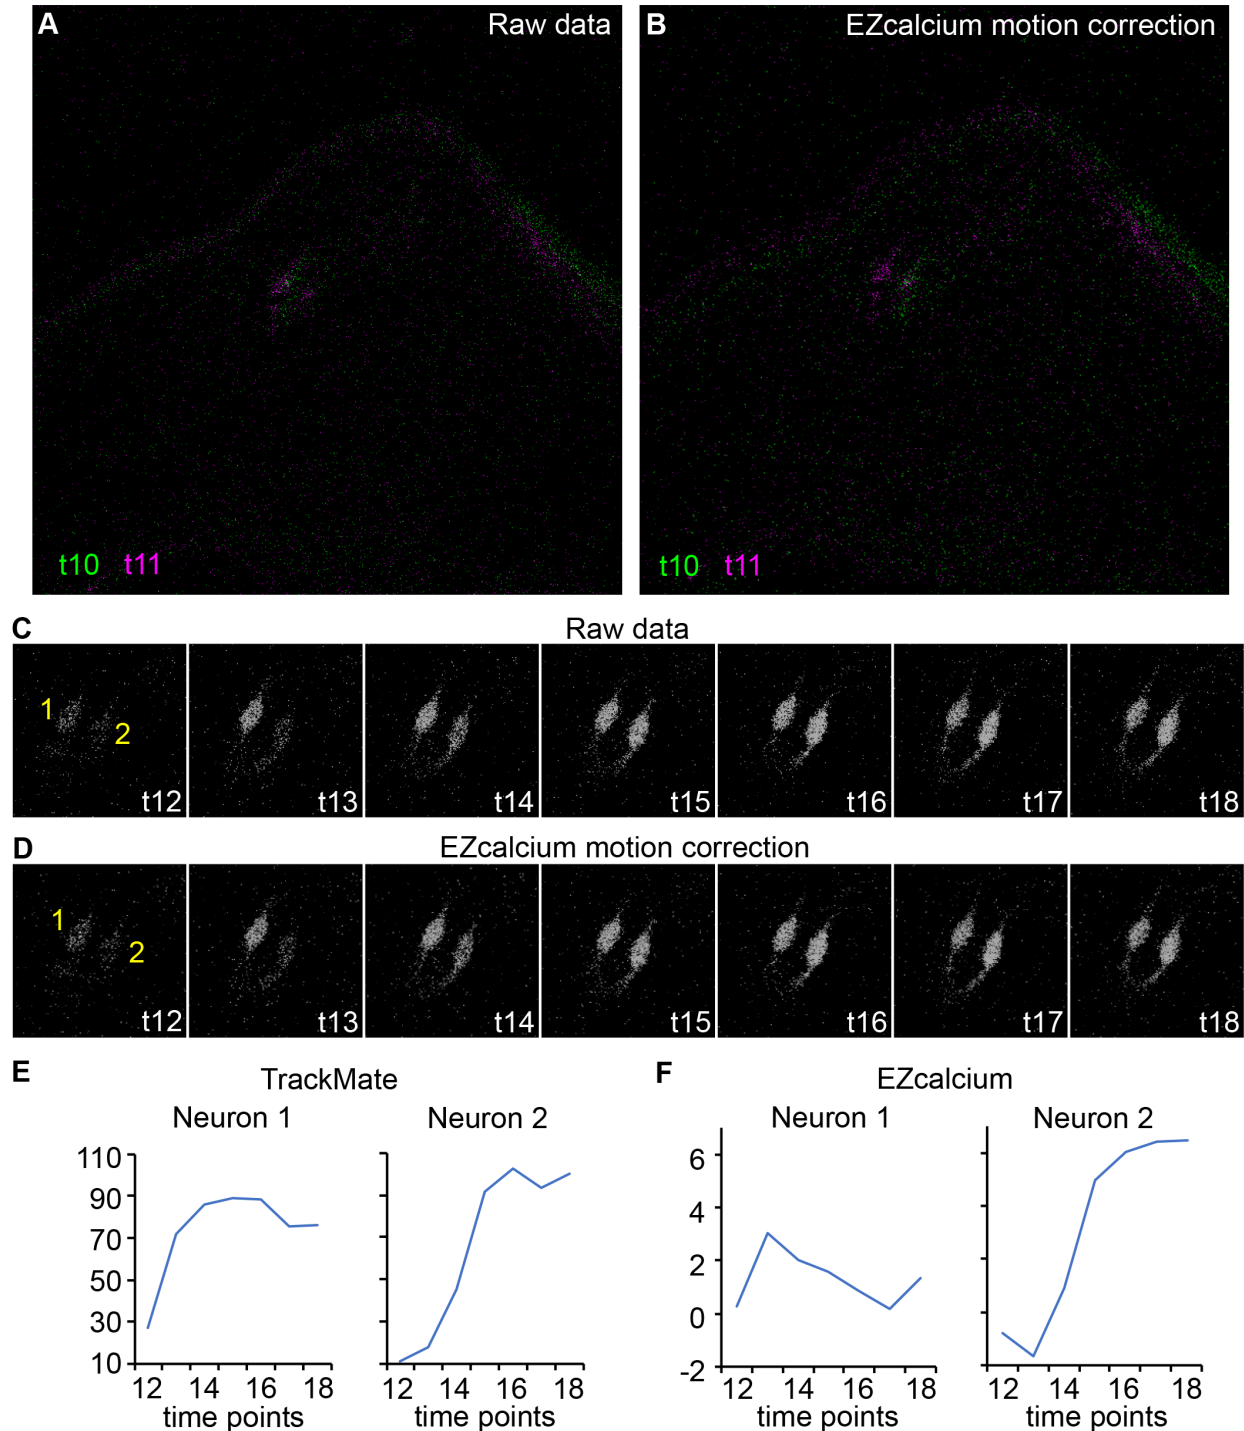

500

501

502

503

504

505

506

507

**Fig S3. TrackMate outperforms EZcalcium in cool cell calcium imaging analysis.** (A,B) EZcalcium does not always correct the x/y motion of cool cells. All possible non-rigid settings with their maximum allowed movements have been tested. The genotype is *Ir21a-Gal4;UAS-GCaMP6m*. (A) Raw images. (B) Images after motion correction by EZcalcium. Green: time point 10 (t10). Magenta: time point 11 (t11). Images are at z-position 8. (C,D) Seven continuous time points (t12-18) from raw images (C) and images after motion correction by EZcalcium (D). Yellow 1 and 2 indicate Neuron 1 and Neuron 2, respectively. (E) Fluorescence intensities are extracted by

508 TrackMate from (C). (F) Fluorescence intensities are extracted by EZcalcium from (D). Images are  
509 at z-position 8. Of note, EZcalcium automatically recognizes neither neuron and thus manual ROI  
510 selection is performed. The ROI shapes are determined by EZcalcium.

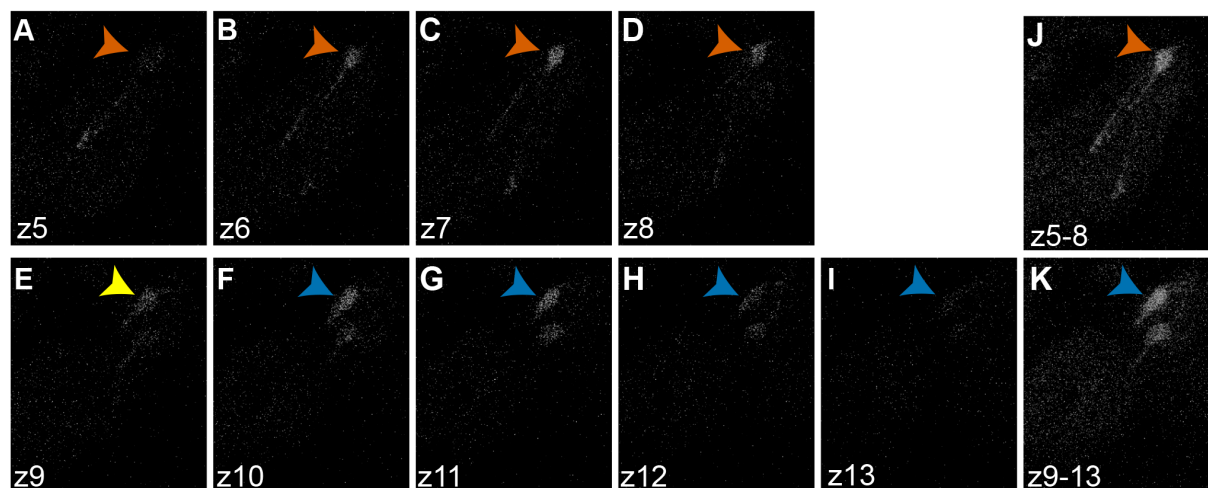

511  
512 **Fig S4. Generation of maximal projection images of overlapping cells.** (A-I) z-positions from 5 to  
513 13. (J) The maximal projection image from z5 to z8. (K) The maximal projection image from z9 to  
514 13. The same calcium imaging data as **Fig 5**. Of note, it is subjective to decide whether the signal  
515 at z9 (yellow neuron in (E)) is from the orange cell or the blue cell.

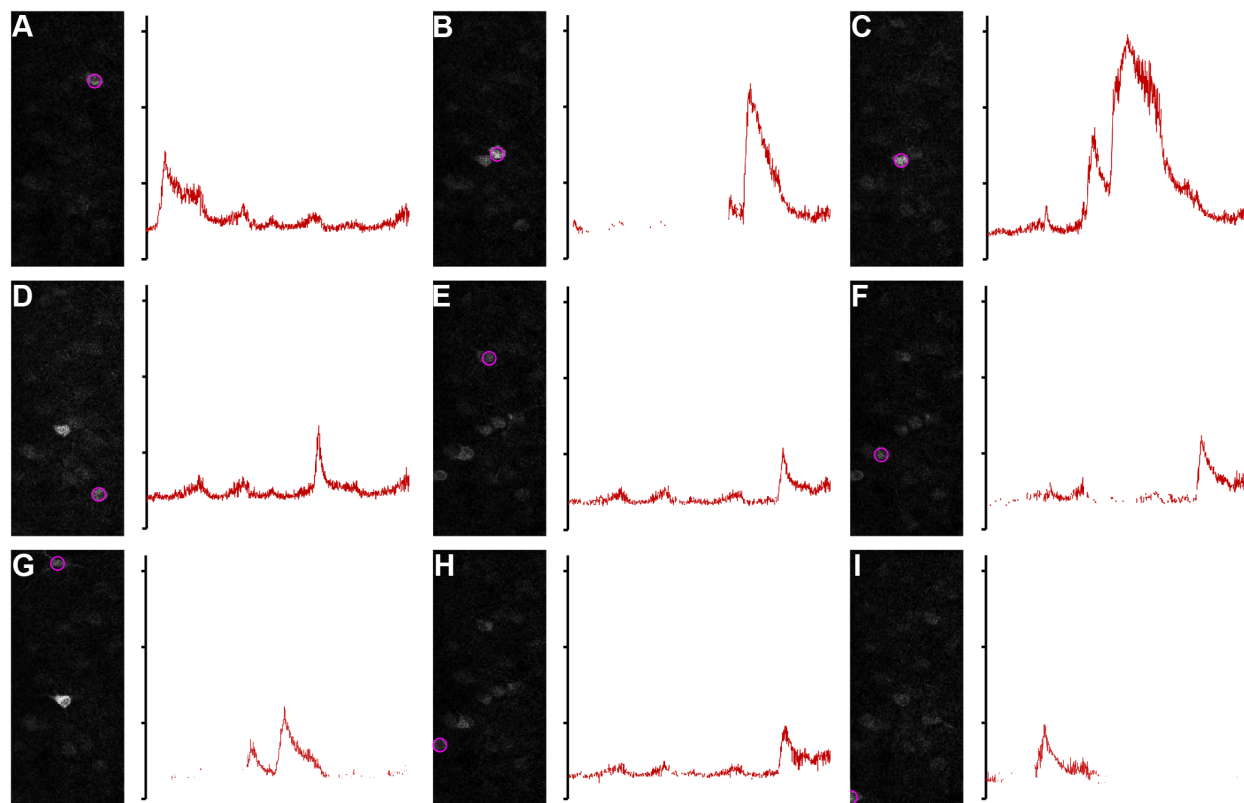

516  
517 **Fig S5. TrackMate analyzes two-photon calcium imaging of hippocampal activity.** Fluorescence  
518 changes of nine neurons (magenta in A-I) are analyzed by TrackMate. The y-axis of the right panel  
519 is fluorescence intensities extracted by TrackMate of a range between 0 and 160.

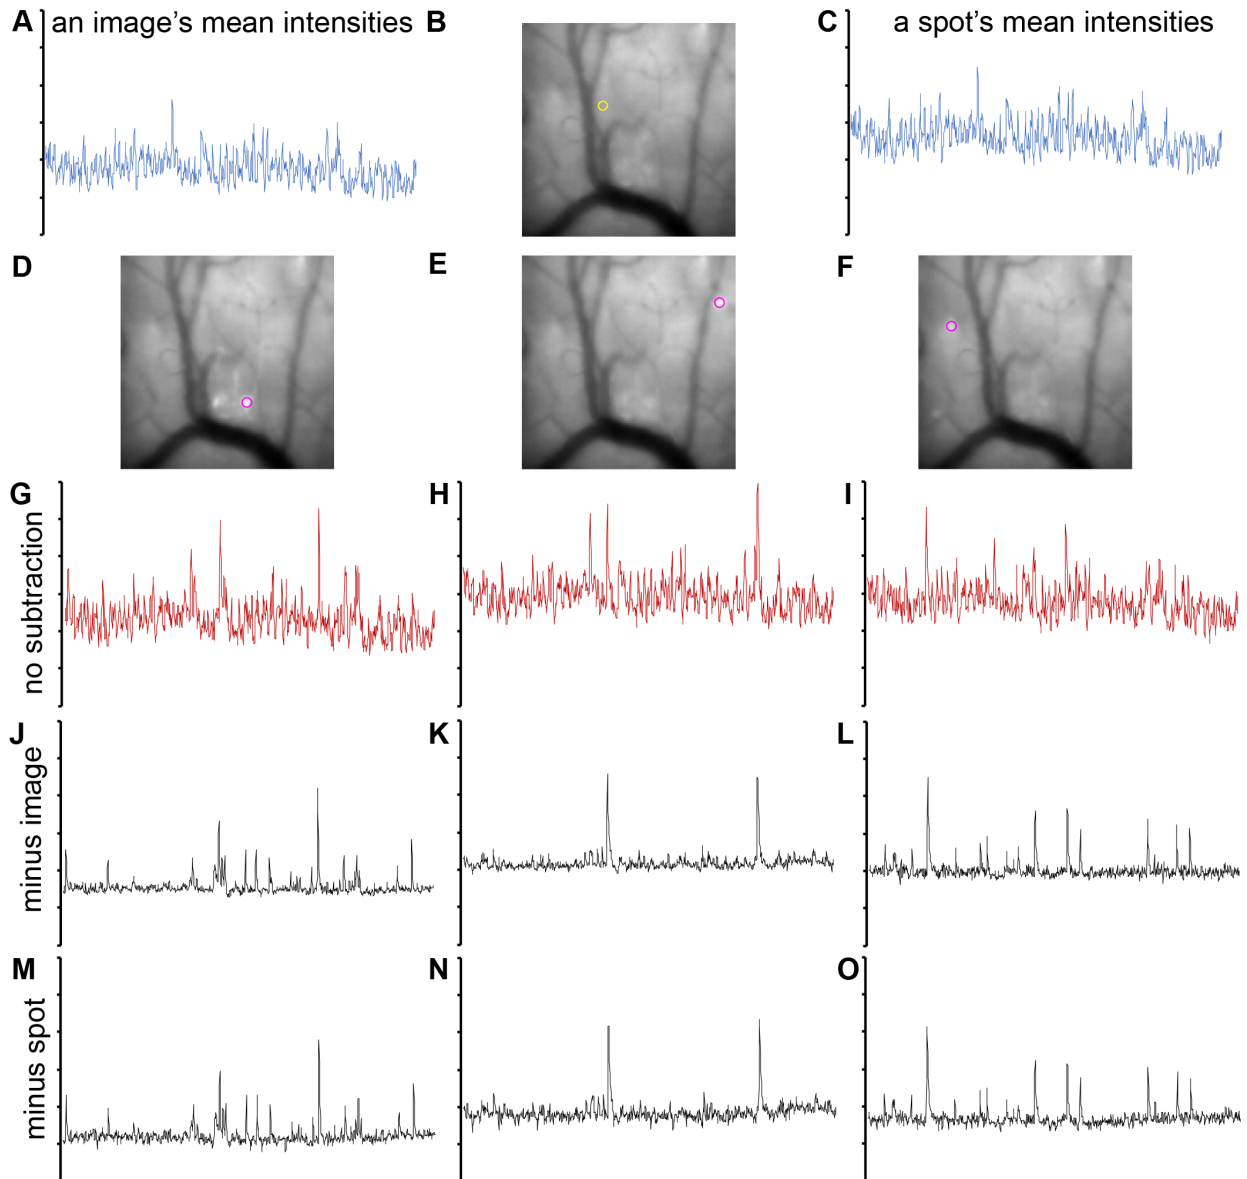

520  
521  
522  
523  
524  
525  
526  
527  
528  
529  
530  
531

**Fig S6. TrackMate analyzes microendoscopic data recorded in the dorsal striatum.** (A) The mean intensities of each image are extracted by TrackMate. y-axis: fluorescence intensities (90-210). (B,C) Mean intensities of a spot (yellow in B) are extracted from every image by TrackMate. This spot does not include active neurons during the whole recording process. y-axis: fluorescence intensities (110-230). (D-O) Fluorescence changes of three neurons (magenta in D-F) are analyzed by TrackMate. (G-I) Mean intensities of the corresponding neurons in D-F are extracted by TrackMate. y-axis: fluorescence intensities (110-230). (J-L) Fluorescence changes are indicated by the difference between neurons' intensities (G-I) and mean intensities of whole images (A). y-axis: fluorescence intensities (0-120). (M-O) Fluorescence changes are indicated by the difference between neurons' intensities (G-I) and a non-active spot's intensities (C). y-axis: fluorescence intensities (-30-90).

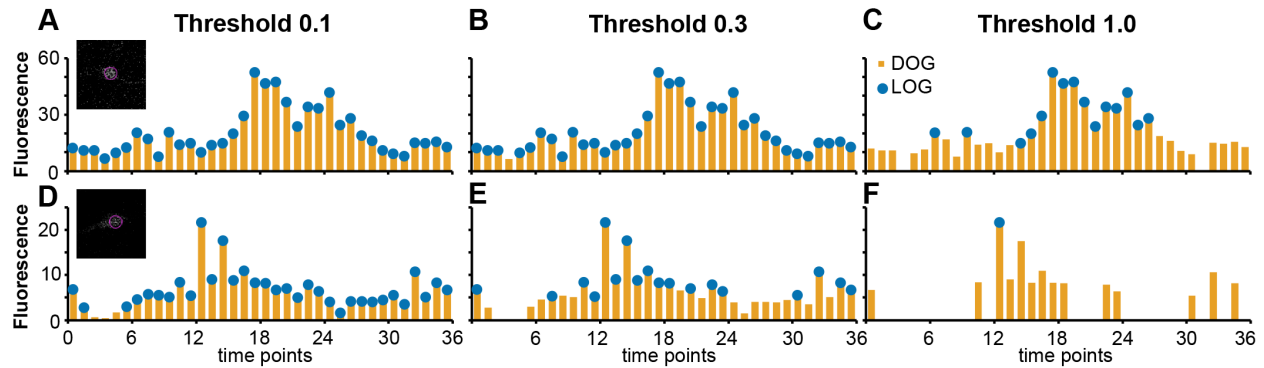

532

533

534

535

536

537

538

539

540

541

542

543

544

545

546

547

548

549

**Fig S7. The DoG detector is more sensitive to weak signals.** Two neurons with weak calcium signals are analyzed. (A-C) The first neuron (*Ir21a-Gal80/UAS-GCaMP6;Ir93a-Gal4*) is analyzed by DoG and LoG at different thresholds. (A) The threshold is set at 0.1. Both DoG and LoG detect all 36 time points. (B) The threshold is set at 0.3. Among 36 time points, DoG detects 36, and LoG detects 35. (C) The threshold is set at 1.0. Among 36 time points, DoG detects 34, and LoG detects 15. (D-F) The second neuron (*UAS-GCaMP6;Ir68a-Gal4*) is analyzed by DoG and LoG at different thresholds. (D) The threshold is set at 0.1. DoG detects all 36 time points, and LoG detects 34. (E) The threshold is set at 0.3. Among 36 time points, DoG detects 33, and LoG detects 18. (F) The threshold is set at 1.0. Among 36 time points, DoG detects 14, and LoG detects only one.

**Table S1. TrackMate generates reproducible results.** Two neurons are tested by three operators, four computers (three Mac and one Windows), and two TrackMate versions. When TrackMate versions and parameters are the same, different operators and computers export the same results. If using different TrackMate versions, the results are slightly varied even with the same parameters. Yellow cells indicate different results from the two TrackMate versions.

**Movie S1. A virtual tutorial to explain how to use TACI.**
